# Supplementary material for: Hydrogen bond synthon competition in the stabilization of theophylline cocrystals
Source: Royal Society of Chemistry journal article supplement (doi:10.1039/c3ce42332h), 2014-01-01
Supplement: c3ce42332h.pdf [file c3ce42332h.pdf]

## Supplementary Information

# Hydrogen Bond Synthon Competition in the Stabilization of Theophylline Cocrystals

Bipul Sarma,\* and Basanta Saikia

Department of Chemical Sciences, Tezpur University, Tezpur-784028, India

\*E-mail: [sarmabipul@gmail.com](mailto:sarmabipul@gmail.com) or [bcsarma@tezu.ernet.in](mailto:bcsarma@tezu.ernet.in)

**Figure S1** ORTEP of cocrystals 1-7.

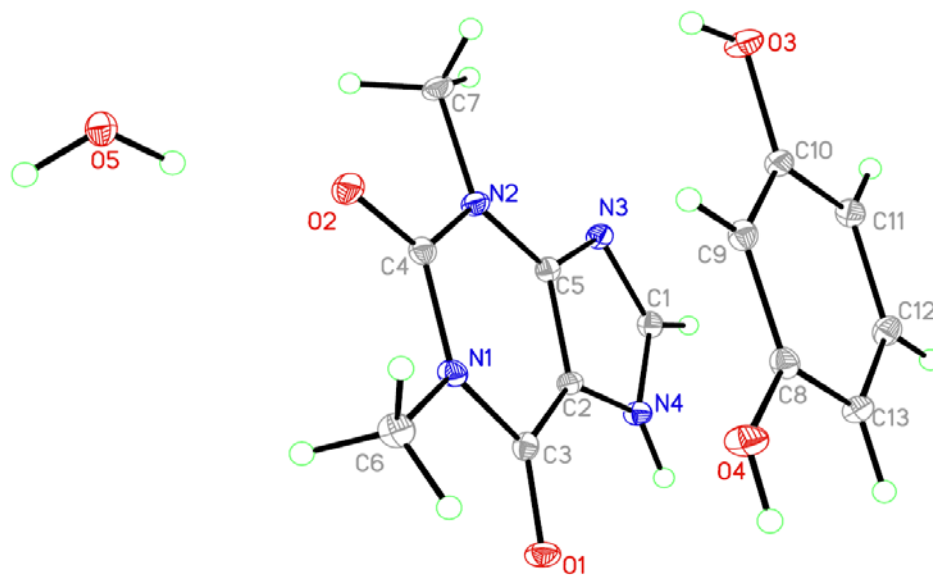

(a) Cocystal 1 [Theo•Res•H<sub>2</sub>O]

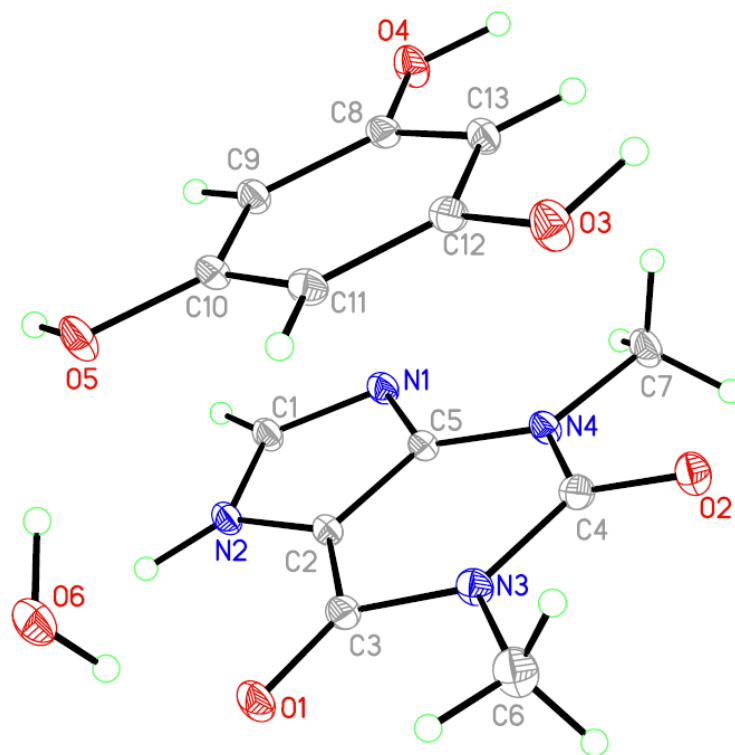

(b) Cocystal 2 [Theo•Phu•H<sub>2</sub>O]

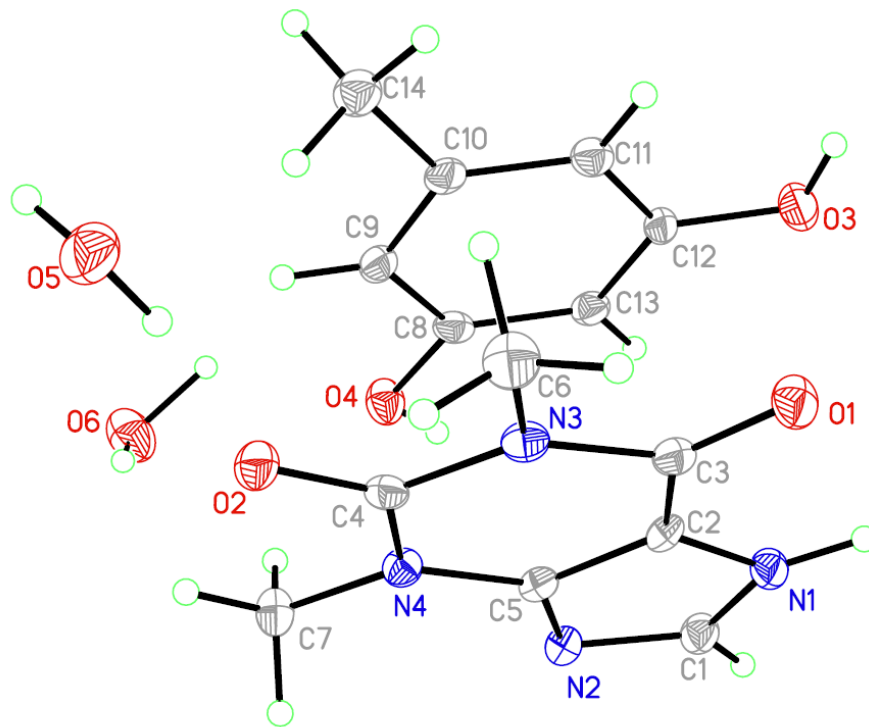

(c) Cocystal 3 [Theo•Orc•2H<sub>2</sub>O]

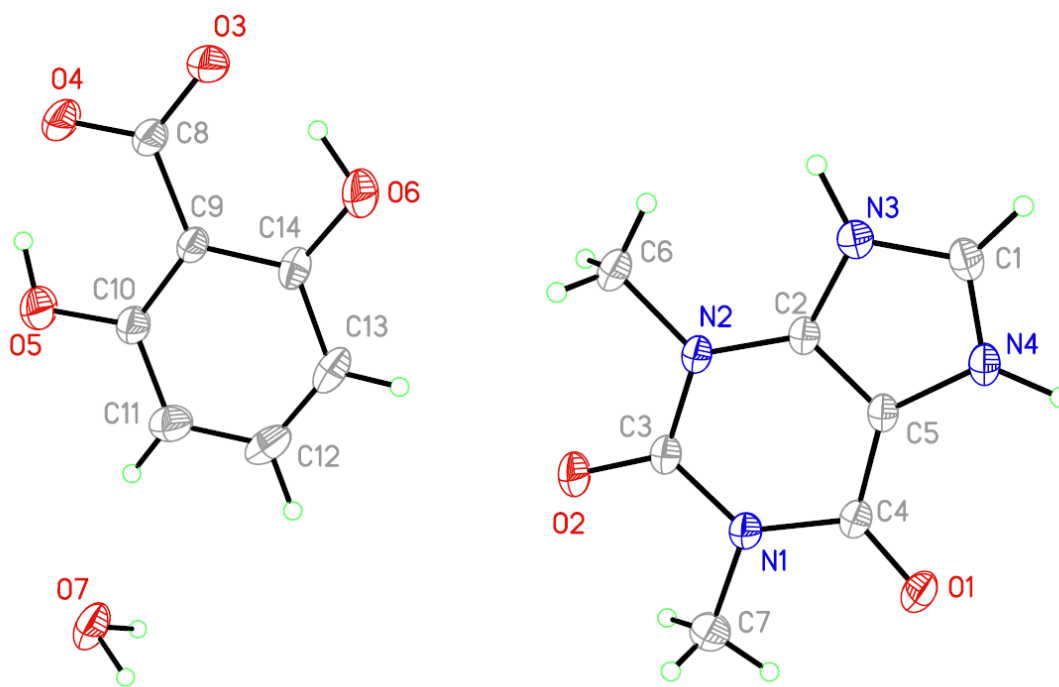

(d) Cocystal/salt 4 [Theo•2,6-DHBA•H<sub>2</sub>O]

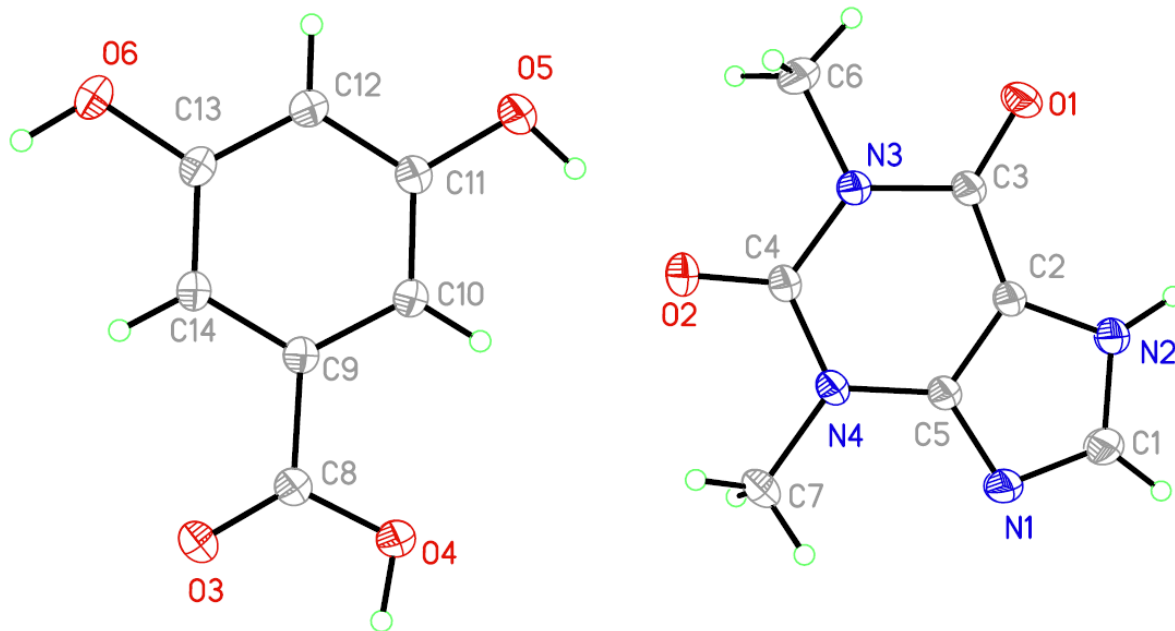

(e) Cocystal 5 [Theo•3,5-DHBA]

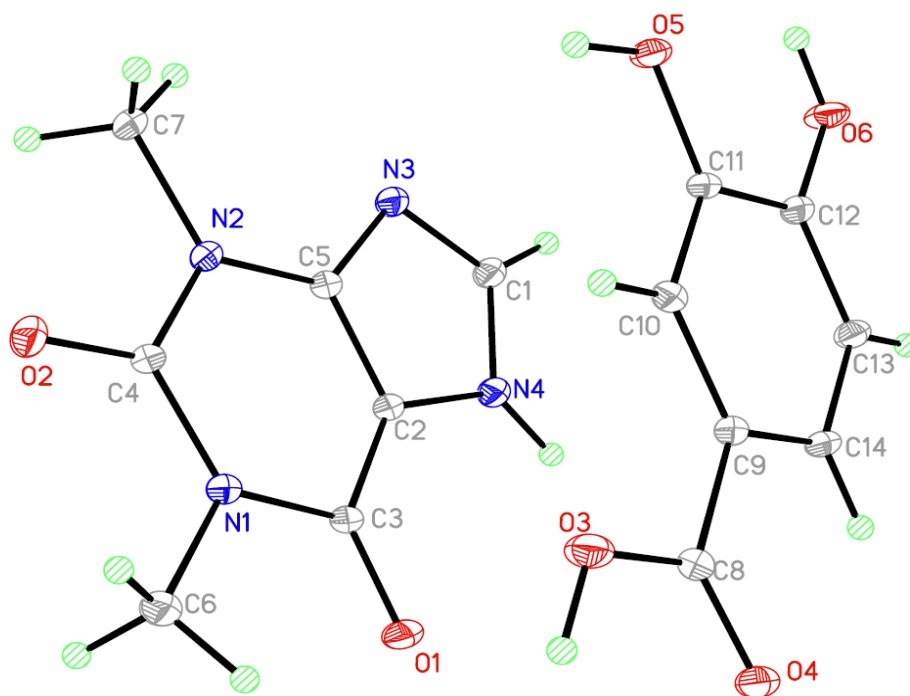

(f) Cocystal 6 [Theo•3,4-DHBA]

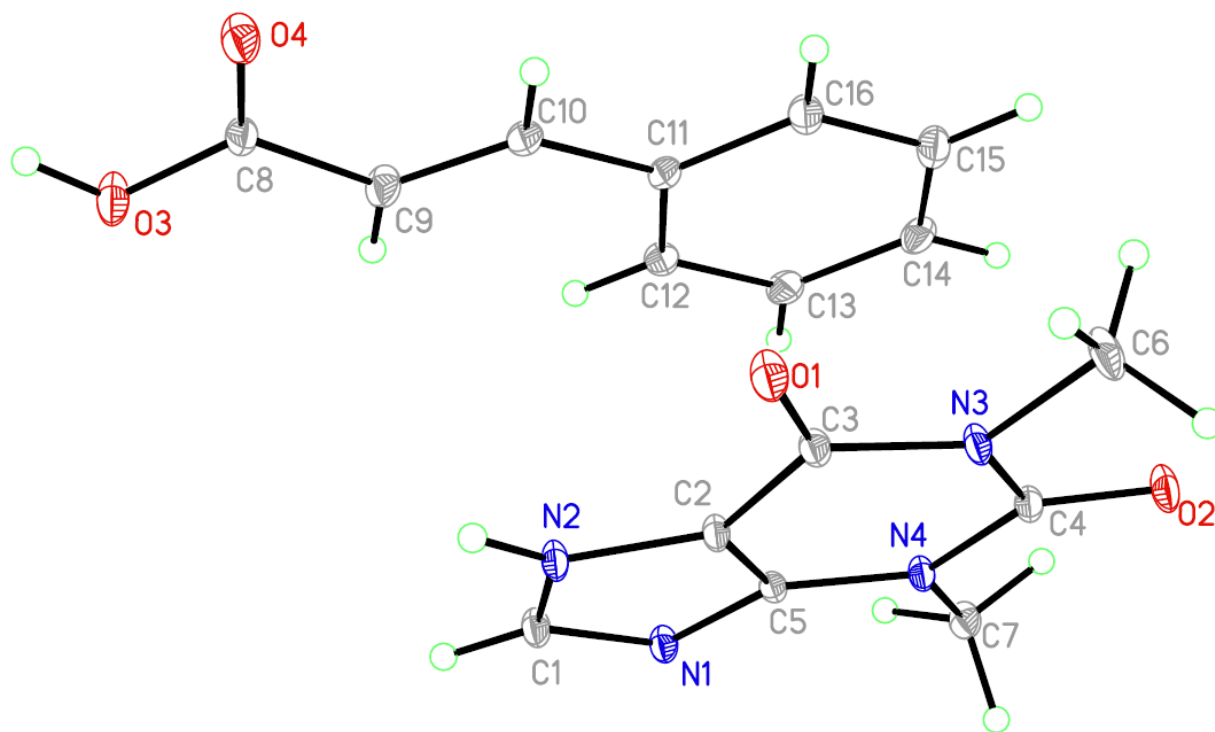

(g) Cocystal 7 [Theo•CA]

**Figure S2** Powder X-ray diffraction of cocrystals **1-7** compared with simulated from corresponding crystal structure. Slight shifting of few peaks from the original crystal structure is due to the data collection temperature difference (Crystal structure at 100K, experimental PXRD at 298K for cocrystals **1** to **4**) which is not corrected during Reitveld refinement.

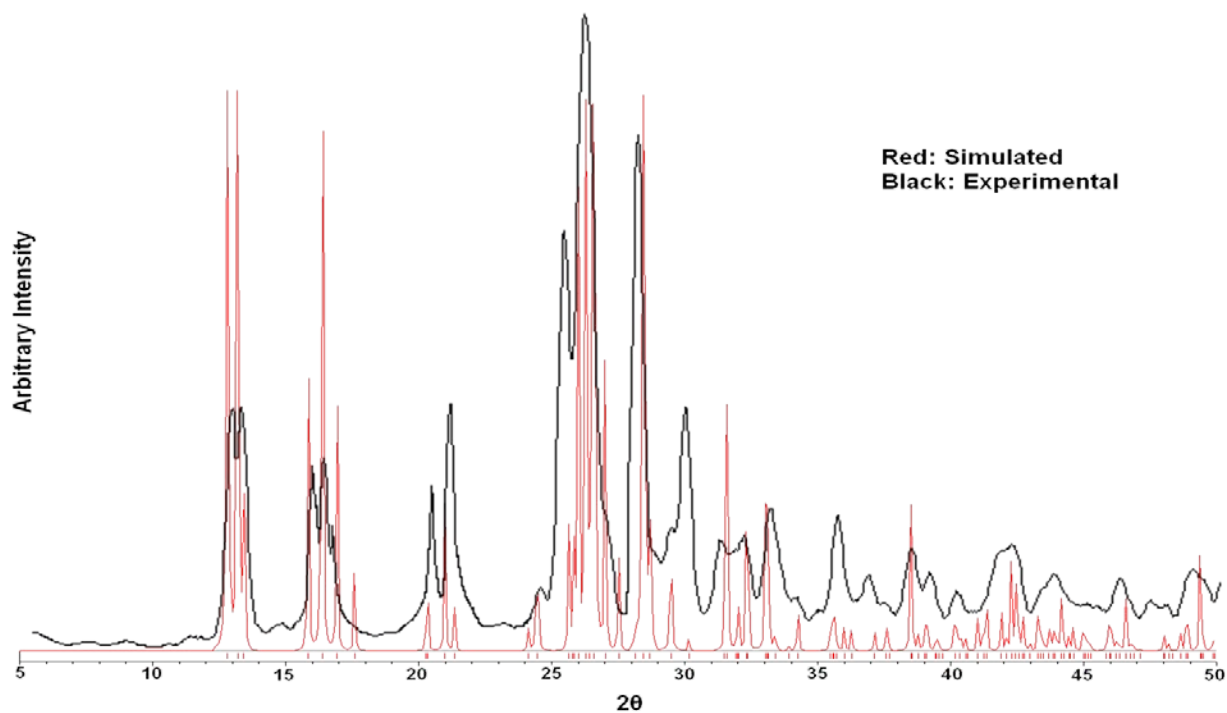

(a) Cocystal **1** [Theo•Res•H<sub>2</sub>O] (overlay only)

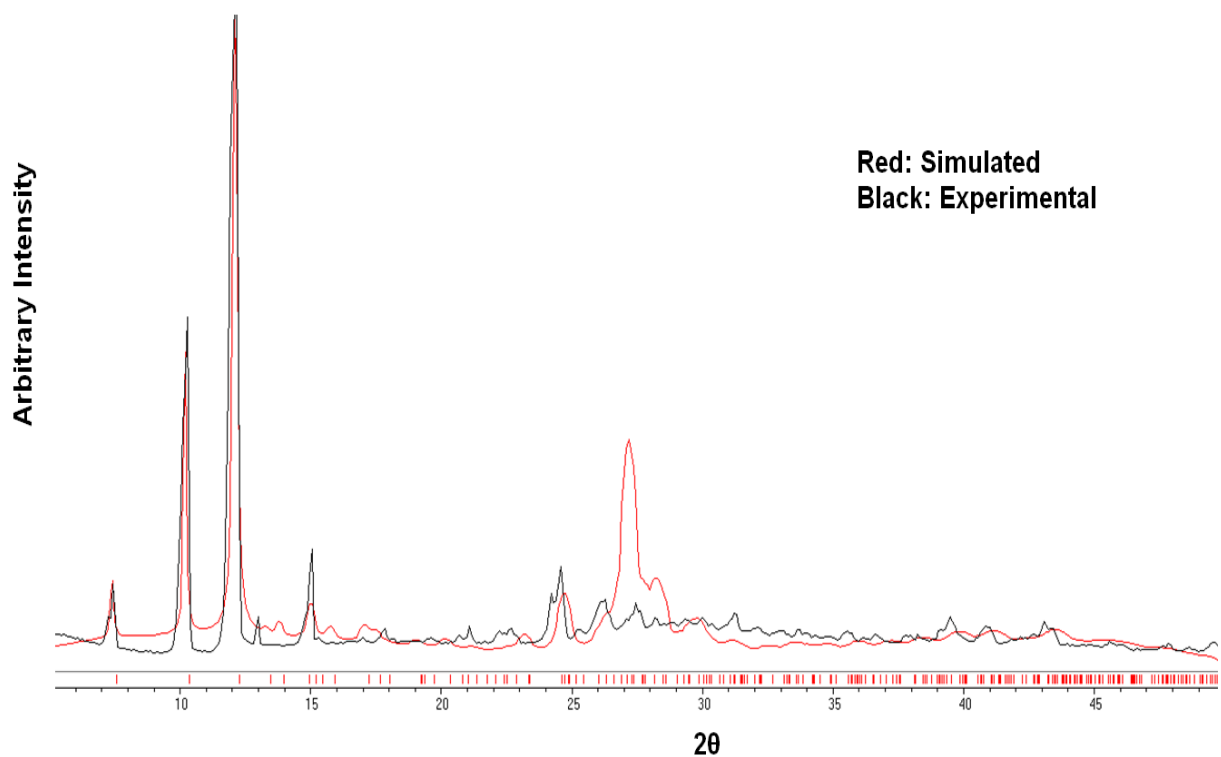

(b) Cocystal 2 [Theo•Phu•H<sub>2</sub>O]

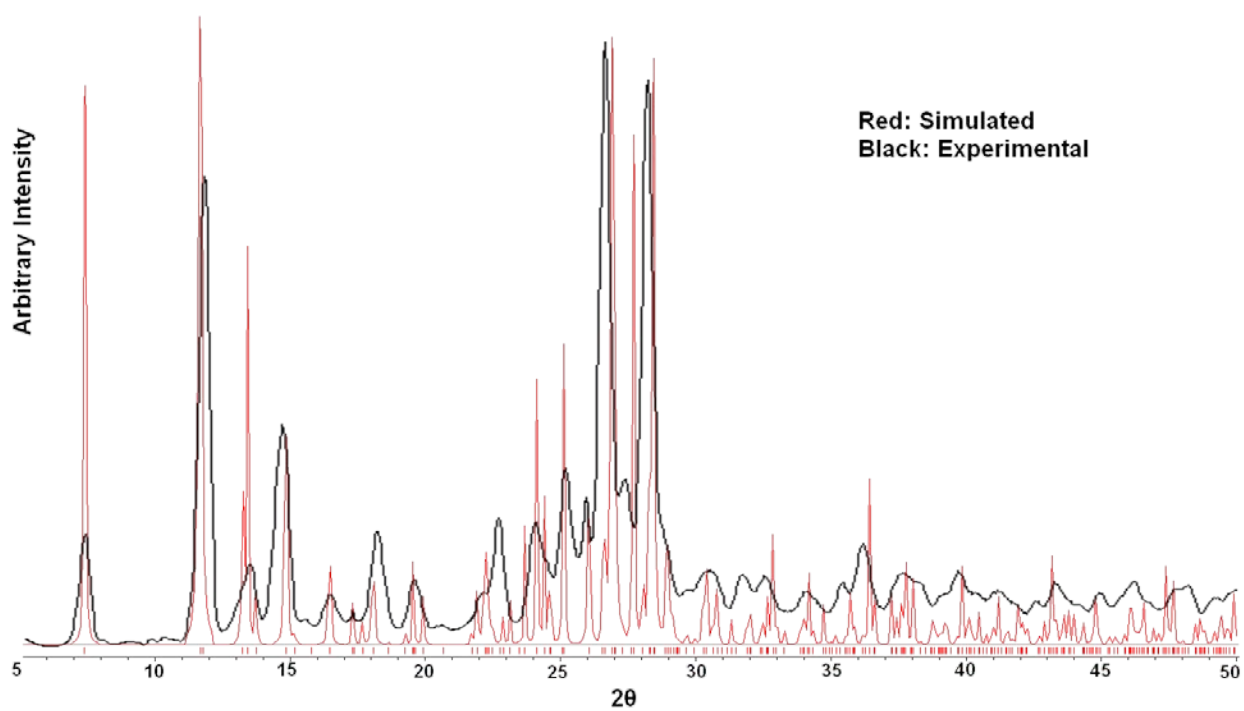

(c) Cocystal 3 [Theo•Orc•2H<sub>2</sub>O] (overlay only)

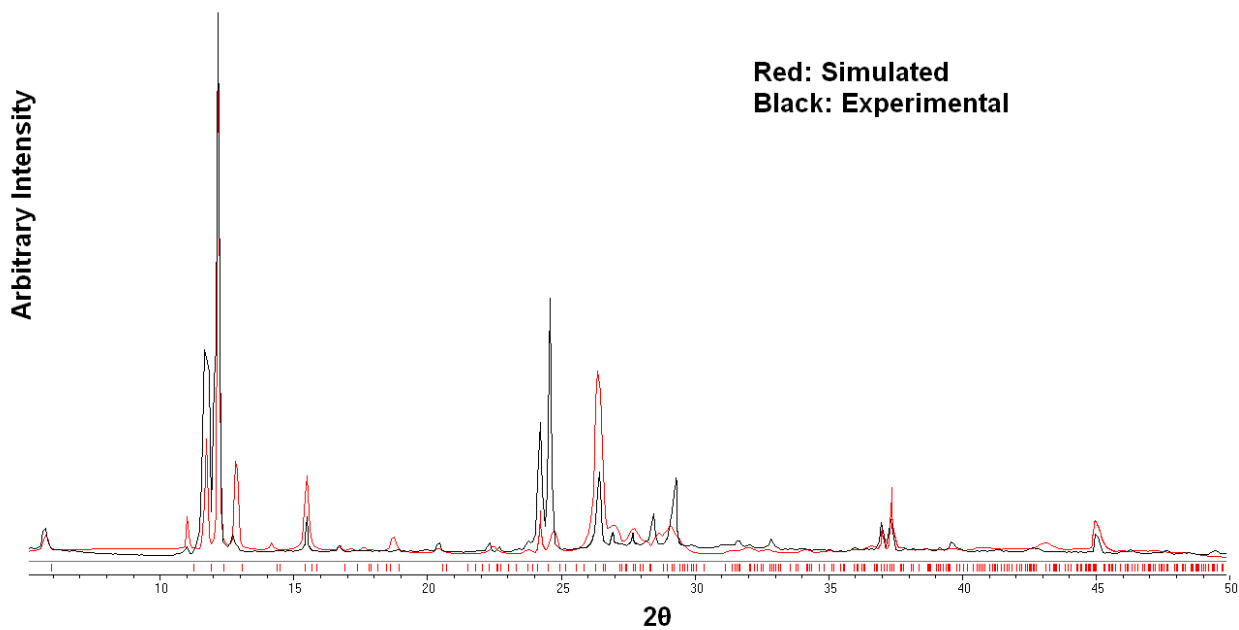

(d) Cocystal 4 [Theo•2,6-DHBA•H<sub>2</sub>O]

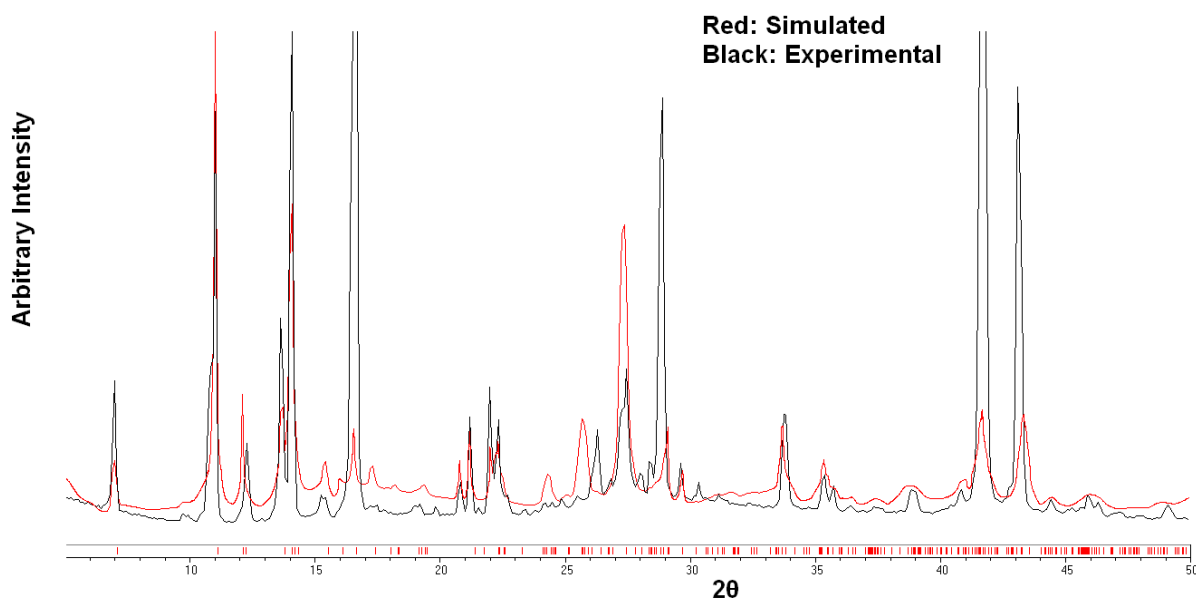

(e) Cocystal 5 [Theo•3,5-DHBA]



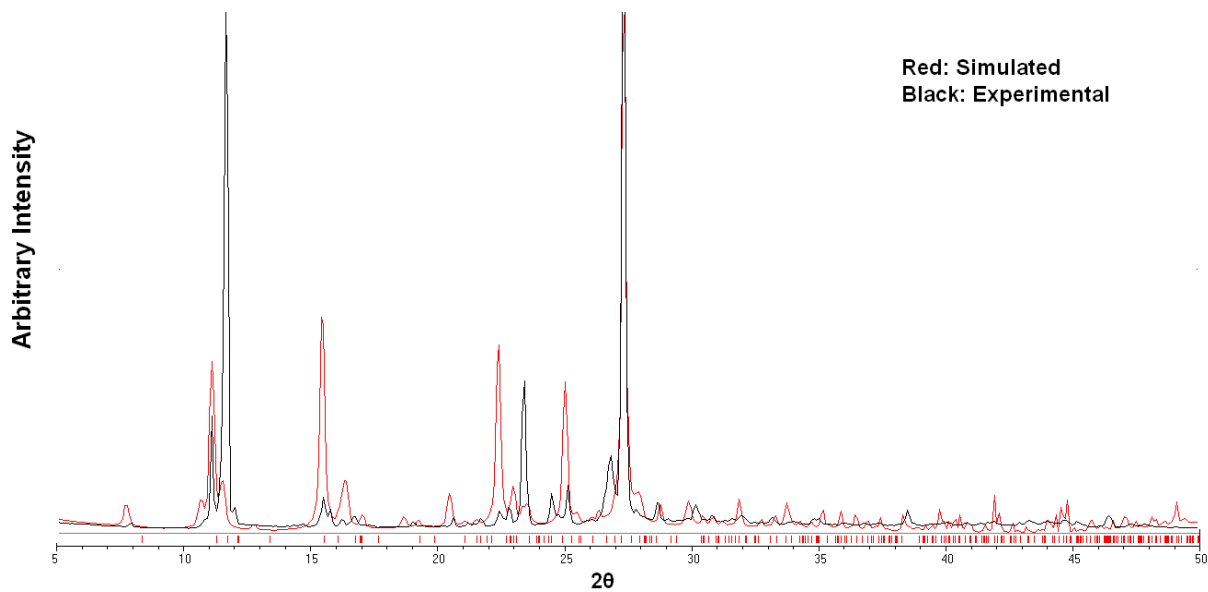

(f) Cocystal 6 [Theo•3,4-DHBA]

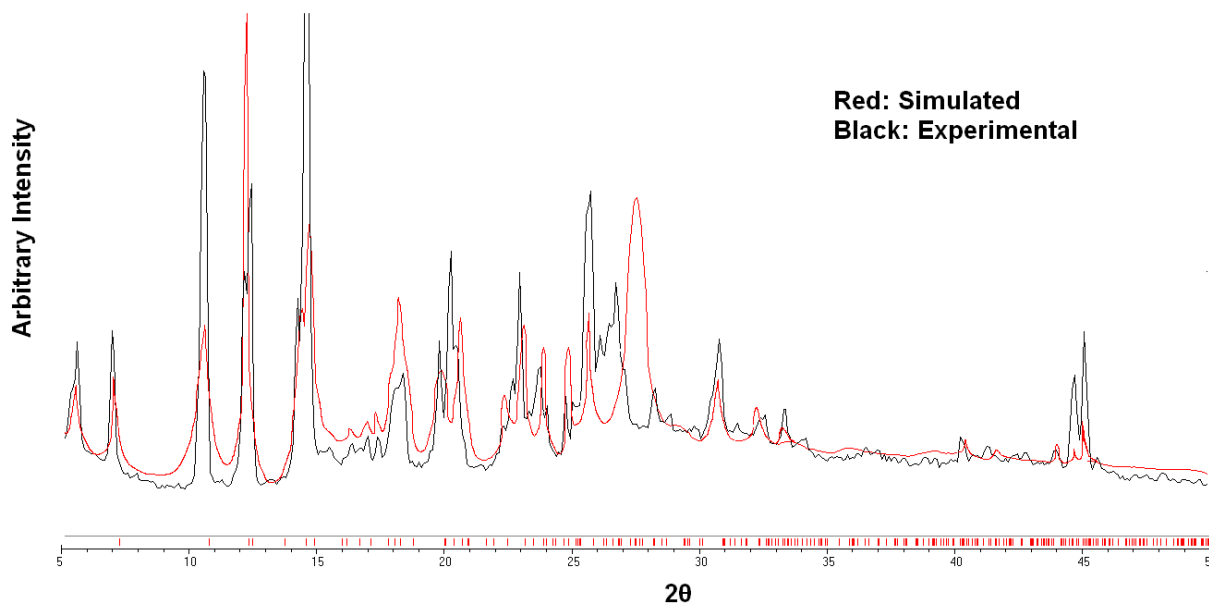

(g) Cocystal 7 [Theo•CA]

## Solubility determination of cocrystals 1-7 using UV-Vis spectroscopy:

*Method:* UV spectrometry was used to determine the water solubility of the cocrystals. For this, a series of standard solution of the cocrystals were prepared. The absorbance of the standard solution of each cocrystal was measured and the calibration curve with absorbance vs. conc. was plotted. The concentration of the unknown solution,  $C_u$  of the cocrystal measured from the slope and intercept of the calibration curve. Cocrystal concentration vs. absorbance curve is linear as it follows Beer's law.

The standard solution in water of the cocrystals were prepared with 0.1, 0.2, 0.3, 0.4 mmol concentration in a 25 mL volumetric flask. A saturated solution of the cocrystals in water, considered as unknown solution was prepared at constant temperature using jacketed vessel. For all experiments Millipore water was taken and considered as blank for UV absorption. Experiments were repeated for 3 times to optimize the result.

Solubility parameter table of the coformer and cocrystals

| Coformer                              | *Coformer solubility mg/mL (mmol/mL) | <sup>§</sup> Theophylline solubility mg/mL (mmol/mL) | Cocrystal                                 | <sup>§</sup> Cocrystal Solubility mg/mL (mmol/mL) |
|---------------------------------------|--------------------------------------|------------------------------------------------------|-------------------------------------------|---------------------------------------------------|
| Resorcinol                            | 11.00 (0.10)                         | 8.24 (0.0457)<br>at 20 °C                            | <b>1</b> [Theo.Res.H <sub>2</sub> O]      | 23.60 (0.076)                                     |
| Phluroglucinol                        | 10.00 (0.08)                         |                                                      | <b>2</b> [Theo.Phu.H <sub>2</sub> O]      | 27.20 (0.0839)                                    |
| Orcinol                               | 16.50 (0.13)                         |                                                      | <b>3</b> [Theo.Orc.2H <sub>2</sub> O]     | 34.50 (0.1014)                                    |
| 2,6-Dihydroxy benzoic acid [2,6-DHBA] | 2.50 (0.016)                         |                                                      | <b>4</b> [Theo.2,6-DHBA.H <sub>2</sub> O] | 17.60 (0.0526)                                    |
| 3,5-Dihydroxy benzoic acid [3,5-DHBA] | 8.40 (0.05)                          |                                                      | <b>5</b> [Theo.3,5-DHBA]                  | 0.14 (0.0004)                                     |
| 3,4-Dihydroxy benzoic acid [3,4-DHBA] | 12.40 (0.08)                         |                                                      | <b>6</b> [Theo.3,4-DHBA]                  | 9.4 (0.0371)                                      |
| Cinnamic acid [CA]                    | 0.50 (0.003)                         |                                                      | <b>7</b> [Theo.CA]                        | 0.62 (0.0018)                                     |

\* Collected from literature

<sup>§</sup> Determined experimentally

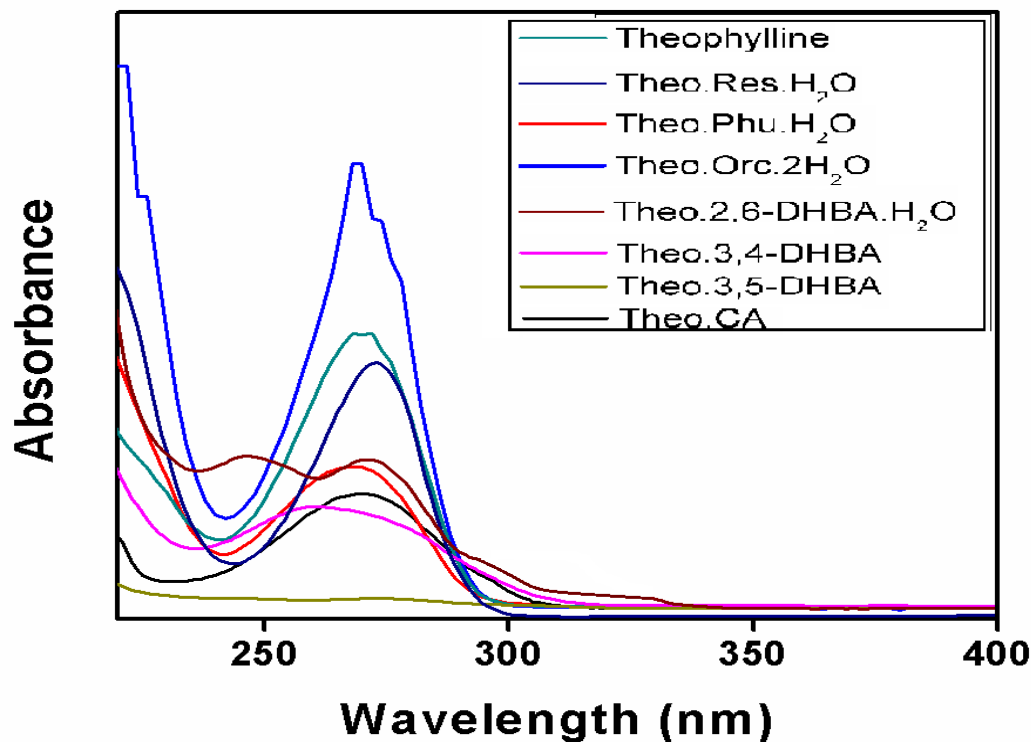

**Figure S3a** UV spectra for the cocrystals of API Theophylline at 270 nm wavelength. Hydrogen bonding plays a vital role in UV absorption. Predictable shifts in the wavelength occur with changes in substituents or the structure adjacent to a group. These shifts can be explained in terms of an inductive effect, hydrogen bonding, a mesomeric or resonance effect and steric factors such as ring strain. Functional groups such as  $\text{-OH}$ ,  $\text{N-H}$  are involved in intermolecular hydrogen bonding in the presence of proton acceptors i.e. oxygen and nitrogen from theophylline. Intermolecular hydrogen bonding is increased as solute concentration increases but intramolecular hydrogen bonding is unaffected by changes in solute concentration. Hydrogen bonding shifts the UV absorption to shorter wavelength. The hypsochromic shift for the cocrystal Theo-3, 4 DHBA attributed from the extensive hydrogen bonding and the formation of  $\text{-COOH}$  acid homo dimer. Small hypsochromic shift for the cocrystal Theo.Orc.2H<sub>2</sub>O is due to involvement of both the  $\text{C=O}$  groups in  $\text{O-H}\cdots\text{O}$  hydrogen bonding with bridging water molecules.
